# Supplementary material for: Novel Adsorbent Material from Plinia cauliflora for Removal of Cationic Dye from Aqueous Solution
Source: MDPI journal article supplement (doi:10.3390/molecules28104066), 2023-05-12
Supplement: s1 [file s1]

## Supplementary Materials

### Novel adsorbent material from jaboticaba bark (*Plinia cauliflora*): production, characterization, and application in the removal of cationic die from aqueous solution

Natalia Nara Janner <sup>1</sup>, Luana Vaz Tholozan <sup>1</sup>, Guilherme Kurz Maron <sup>2</sup>, Neftali Lenin Villarreal Carreno <sup>2</sup>, Alaor Valério Filho <sup>2</sup> and Gabriela Silveira da Rosa <sup>1,\*</sup>

**Table S1** Kinetics and isotherm models

|          | Equation                                                 | Model                   |
|----------|----------------------------------------------------------|-------------------------|
| Kinetics | $q_t = q_e(1 - e^{-k_1 t})$                              | Pseudo-first order      |
|          | $q_t = \left( \frac{q_e^2 k_2 t}{1 + q_e k_2 t} \right)$ | Pseudo-second order     |
|          | $q_t = \frac{1}{\alpha} \ln(1 + \alpha \beta t)$         | Elovich                 |
|          | $q_t = k_{di} t^{\frac{1}{2}} + C$                       | Intraparticle diffusion |
| Isotherm | $q_e = \frac{Q_{max} K_L C_e}{1 + K_L C_e}$              | Langmuir                |
|          | $q_e = K_F C_e^{\frac{1}{n_F}}$                          | Freundlich              |
|          | $qe = \frac{RT}{b} K_T C_e \ln ()$                       | Temkin                  |

**Table S2** ANOVA for the factorial design.

| JB                                  |          |    |                    |                     |                |                                    |
|-------------------------------------|----------|----|--------------------|---------------------|----------------|------------------------------------|
|                                     | SS       | DF | F <sub>value</sub> | F <sub>tabled</sub> | R <sup>2</sup> | R <sup>2</sup> <sub>adjusted</sub> |
| <i>q</i>                            |          |    |                    |                     |                |                                    |
| Regression                          | 12012.67 | 3  | 49.03              | 3.71                | 0.9363         | 0.9996                             |
| Residual                            | 816.75   | 10 |                    |                     |                |                                    |
| Lack of fit                         | 811.88   | 1  |                    |                     |                |                                    |
| Pure error                          | 4.87     | 9  |                    |                     |                |                                    |
| Total                               | 1282.42  | 13 |                    |                     |                |                                    |
| <i>R</i>                            |          |    |                    |                     |                |                                    |
| Regression                          | 132.53   | 3  | 4.43               | 3.71                | 0.8708         | 0.9496                             |
| Residual                            | 99.66    | 10 |                    |                     |                |                                    |
| Lack of fit                         | 87.95    | 1  |                    |                     |                |                                    |
| Pure error                          | 11.71    | 9  |                    |                     |                |                                    |
| Total                               | 232.19   | 13 |                    |                     |                |                                    |
| JB – H <sub>3</sub> PO <sub>4</sub> |          |    |                    |                     |                |                                    |
|                                     | SS       | DF | F <sub>value</sub> | F <sub>tabled</sub> | R <sup>2</sup> | R <sup>2</sup> <sub>adjusted</sub> |
| <i>q</i>                            |          |    |                    |                     |                |                                    |
| Regression                          | 3259.52  | 2  | 137.61             | 3.98                | 0.8763         | 0.9538                             |
| Residual                            | 460.04   | 11 |                    |                     |                |                                    |
| Lack of fit                         | 288.05   | 2  |                    |                     |                |                                    |
| Pure error                          | 171.99   | 9  |                    |                     |                |                                    |
| Total                               | 3719.57  | 13 |                    |                     |                |                                    |
| <i>R</i>                            |          |    |                    |                     |                |                                    |
| Regression                          | 2607.31  | 2  | 280.32             | 3.98                | 0.9808         | 0.9885                             |
| Residual                            | 104.21   | 11 |                    |                     |                |                                    |
| Lack of fit                         | 25.00    | 2  |                    |                     |                |                                    |
| Pure error                          | 185.74   | 9  |                    |                     |                |                                    |
| Total                               | 2818.05  | 13 |                    |                     |                |                                    |
| JB – NaOH                           |          |    |                    |                     |                |                                    |
|                                     | SS       | DF | F <sub>value</sub> | F <sub>tabled</sub> | R <sup>2</sup> | R <sup>2</sup> <sub>adjusted</sub> |
| <i>q</i>                            |          |    |                    |                     |                |                                    |
| Regression                          | 3390.99  | 3  | 38.12              | 3.71                | 0.9196         | 0.9982                             |
| Residual                            | 296.55   | 10 |                    |                     |                |                                    |
| Lack of fit                         | 289.85   | 1  |                    |                     |                |                                    |
| Pure error                          | 6.71     | 9  |                    |                     |                |                                    |
| Total                               | 3687.54  | 13 |                    |                     |                |                                    |
| <i>R</i>                            |          |    |                    |                     |                |                                    |
| Regression                          | 869.12   | 2  | 280.32             | 3.98                | 0.9808         | 0.9885                             |
| Residual                            | 17.05    | 11 |                    |                     |                |                                    |
| Lack of fit                         | 6.87     | 2  |                    |                     |                |                                    |
| Pure error                          | 10.19    | 9  |                    |                     |                |                                    |
| Total                               | 886.17   | 13 |                    |                     |                |                                    |

SS = sum of square; DF = degree of freedom.
